1 **Title**

2 **A comprehensive reference transcriptome resource for the Iberian ribbed newt *Pleurodeles***  
3 ***waltl*, an emerging model for developmental and regeneration biology**

4

5 **Authors**

6 Masatoshi Matsunami<sup>1</sup>, Miyuki Suzuki<sup>2</sup>, Yoshikazu Haramoto<sup>3</sup>, Akimasa Fukui<sup>4</sup>, Takeshi Inoue<sup>5</sup>,  
7 Katsushi Yamaguchi<sup>6</sup>, Ikuo Uchiyama<sup>7</sup>, Kazuki Mori<sup>8</sup>, Kosuke Tashiro<sup>9</sup>, Yuzuru Ito<sup>3</sup>, Takashi  
8 Takeuchi<sup>10</sup>, Ken-ichi T Suzuki<sup>2,11</sup>, Kiyokazu Agata<sup>5</sup>, Shuji Shigenobu<sup>7\*</sup>, and Toshinori Hayashi<sup>10\*</sup>

9

10 <sup>1</sup>Graduate School of Medicine, University of the Ryukyus, Nishihara-cho, Okinawa,  
11 903-0215, Japan

12 <sup>2</sup>Graduate School of Science, Hiroshima University, Higashihiroshima, Hiroshima, 739-8526, Japan

13 <sup>3</sup>Biotechnology Research Institute for Drug Discovery, National Institute of Advanced Industrial  
14 Science and Technology (AIST), Tsukuba, Ibaraki 305-8565, Japan.

15 <sup>4</sup>Department of Biological Sciences, Faculty of Science and Engineering, Chuo University,  
16 Bunkyo-ku, Tokyo, 112-8511, Japan

17 <sup>5</sup>Department of Life Science, Faculty of Science, Gakushuin University, Toyoshima-ku, Tokyo,  
18 171-8588, Japan

19 <sup>6</sup>Functional Genomics Facility, National Institute for Basic Biology, Okazaki, Aichi, 444-8585,  
20 Japan

21 <sup>7</sup>Laboratory of Genome Informatics, National Institute for Basic Biology, Okazaki, Aichi, 444-8585,  
22 Japan

1 <sup>8</sup>Computational Bio-Big Data Open Innovation Lab. (CBBB-OIL), National Institute of Advanced

2 Industrial Science and Technology (AIST), Shinjuku-ku, Tokyo 169-8555, Japan.

3 <sup>9</sup>Laboratory of Molecular Gene Technology, Department of Bioscience and Biotechnology, Faculty

4 of Agriculture, Kyushu University, Fukuoka, Fukuoka 819-0395, Japan

5 <sup>10</sup>School of Life Science, Faculty of Medicine, Tottori University, Yonago, Tottori 683-8503, Japan.

6 <sup>11</sup>Center for the Development of New Model Organisms, National Institute for Basic Biology,

7 Okazaki, Aichi, 444-8585, Japan

8 \* Corresponding authors.

9

## 10 **Contact information**

11 Toshinori Hayashi, Ph.D., Department of Biomedical Sciences, School of Life Sciences, Faculty of

12 Medicine, Tottori University, 86 Nishicho Yonago, Tottori, 683-8503 Japan

13 TEL: +81-859-38-6233 FAX: +81-859-38-6233

14 e-mail: toshih2@tottori-u.ac.jp

15

16 **Running Title:** Transcriptome database for *Pleurodeles waltl*.

17

18 **Key words:** Transcriptome, Iberian ribbed newt, NGS, Model organism

1 **Abstract**

2 Urodele amphibian newts have unique biological properties, notably including prominent  
3 regeneration ability. Iberian ribbed newt, *Pleurodeles waltl*, is a promising model newt along with  
4 the successful development of the easy breeding system and efficient transgenic and genome editing  
5 methods. However, genetic information of *P. waltl* was limited. In the present study, we conducted  
6 an intensive transcriptome analysis of *P. waltl* using RNA-sequencing to build gene models and  
7 annotate them. We generated 1.2 billion Illumina reads from a wide variety of samples across 11  
8 different tissues and 9 time points during embryogenesis. They were assembled into 202,788  
9 non-redundant contigs that appear to cover nearly complete (~98%) *P. waltl* protein-coding genes.  
10 Using the gene set as a reference, our gene network analysis identified regeneration-,  
11 developmental-stage-, and tissue-specific co-expressed gene modules. Ortholog analyses with other  
12 vertebrates revealed the gene repertoire evolution of amphibians which includes urodele-specific  
13 loss of *bmp4* and duplications of *wnt11b*. Our transcriptome resource will enhance future research  
14 employing this emerging model animal for regeneration research as well as other areas such as  
15 developmental biology, stem cell biology, cancer research, ethology and toxico-genomics. These  
16 data are available via our portal website, iNewt (<http://www.nibb.ac.jp/imori/main/>).

17

18

19

## 1 Introduction

2 Urodele amphibian newts have an outstanding history as a model organism in experimental  
3 biology. The “Spemann organizer” was discovered using European newts, *Triturus cristatus* and  
4 *Triturus taeniatus*<sup>1</sup>. “Wolffian lens regeneration” was discovered using the newt<sup>2</sup>, and Eguchi et al.,  
5 subsequently demonstrated transdifferentiation of pigment epithelial cells to lens cells by clonal cell  
6 culture using the Japanese fire belly newt, *Cynops pyrrhogaster*<sup>3</sup>. Amphibian newts have provided  
7 the clearest examples of natural reprogramming events, providing an opportunity to study  
8 mechanisms of cellular reprogramming<sup>4-8</sup>. Additionally, studies in newts have yielded a great deal of  
9 knowledge about the regeneration of various tissues and organs, including limb<sup>9</sup>, joint<sup>10</sup>, heart<sup>11</sup>, jaw  
10 <sup>12</sup>, retina<sup>13,14</sup>, brain<sup>15-17</sup>, spinal cord<sup>18</sup>, intestine<sup>19</sup>, testis<sup>20,21</sup>, and lung<sup>22</sup>. Among vertebrates, only  
11 newts are known to be capable of regenerating all of the above-mentioned organs and body parts.  
12 Furthermore, comparative studies of regeneration ability between newts and frogs have provided  
13 new insights for future regenerative medicine, given that frogs (like mammals) lose the ability to  
14 regenerate various tissues and organs after metamorphosis<sup>10,12,23,24</sup>.

15 Newts also have been employed in research other than that on regeneration, reflecting  
16 these animals’ unique biological properties. The genome sizes of newt species are 8-10 times larger  
17 than the human genome<sup>24-26</sup>. Newts are tumor-resistant, despite having a long lifetime<sup>27,28</sup>. Newt  
18 eggs are fertilized via physiological polyspermy<sup>29</sup>. Male newts form new testes even after sexual  
19 maturation<sup>30</sup>. Moreover, the mating behavior of newts is mediated by sexual pheromones<sup>31,32</sup>. Finally,  
20 several groups have shown the utility of the newt for the toxicity testing of chemical compounds<sup>33-35</sup>.  
21 Indeed, aquatic tetrapods like newts can serve as an important indicator of the influence of chemical  
22 compounds on the environment<sup>36</sup>. Therefore, the newt is a versatile model animal that can be used in  
23 various fields of research, including regeneration, stem cell biology, cancer research, developmental

1 biology, reproductive biology, evolution, ethology, and toxico-genomics.

2 Although these properties make newt an attractive model animal, the newt species that have  
3 been used (e.g., the American common newt, *Notophthalmus viridescens*, and the Japanese common  
4 newt, *C. pyrrhogaster*) in classic experiments are not suitable for reverse or molecular genetics  
5 because of the difficulty of breeding these species in captivity. For example, Japanese common  
6 newts spawn seasonally, and each female spawns only a small number of eggs per cycle<sup>37,38</sup>. Three  
7 or more years can be required for sexual maturation in general. In addition, different newt species  
8 have been used for the studies performed in different laboratories, countries, and continents, making  
9 it difficult for members of this research community to share resources and expertise.

10 The Iberian ribbed newt (*Pleurodeles waltl*) is an emerging model newt<sup>24,39</sup>. In contrast  
11 to conventional newt species, *P. waltl* has a vigorous reproductive capacity and is easy to maintain in  
12 the laboratory. Using the *P. waltl* newts, we have established a model experimental system that is  
13 available for molecular genetics<sup>39</sup>. Notably, efficient genome editing was recently demonstrated in *P.*  
14 *waltl*<sup>40,41</sup>. Despite the excellent utilities, the genetic information of Waltl was limited. Recently,  
15 Elewa et al. described a draft sequence of the 20-Gb giant genome and the transcriptome of *P.*  
16 *waltl*<sup>24</sup>. These data provided pioneering references for the newt research field. However, there  
17 remained a popular demand to improve the gene catalogues of this species that can be shared in the  
18 community.

19 In the present study, we sought to create a reference set of comprehensive gene models  
20 for *P. waltl*. To that end, we prepared 29 libraries of mRNA from various tissues and embryonic  
21 stages of *P. waltl* and subjected the libraries to RNA-seq. We combined the resulting > 1.2 billion  
22 reads and assembled these reads. This assembly yielded 1,395,387 contigs and permitted the

1 annotation of 202,788 genes. Using these data, we built a new gene model of *P. waltl*; the resulting  
2 model expected to cover 98% of *P. waltl* protein-coding genes. Moreover, we demonstrated that the  
3 expression patterns of regeneration-specific, developmental-stage-specific, and tissue-specific genes  
4 could be analyzed using our gene model and transcriptome data sets. Finally, we have established a  
5 portal website that provides the research community with access to our data sets.

6

## 1 **Materials and methods**

### 2 **Animals**

3 The *P. waltil* used in this study were raised in a closed colony that originated at Tottori  
4 University. The animals were maintained as described previously<sup>39</sup>. The developmental stages (St)  
5 were defined according to criteria described Shi and Boucaut<sup>42</sup>. To isolate organs or perform surgical  
6 operations for limb and heart regeneration, embryos and adults were anesthetized/euthanized by  
7 immersion in 0.01-0.2% MS-222 (tricaine; Sigma-Aldrich, MO, USA). All procedures were carried  
8 out in accordance with Institutional Animal Care and Use Committee of the respective institute and  
9 the national guidelines of the Ministry of Education, Culture, Sports, Science & Technology of  
10 Japan.

11

### 12 **RNA preparation, library construction, and RNA sequencing**

13 Sequence data collection was performed in 5 laboratories. Methods for total RNA  
14 extraction, library preparation, and sequencing of the resulting libraries are summarized in Table 1  
15 and Supplementary Table 1.

16

### 17 **Assembly and ORF prediction**

18 All sequenced reads were employed for *de novo* assembly using the Trinity program ver.  
19 2.4.0<sup>43</sup> under default parameter settings; the trimming option was performed using the trimmomatic  
20 software<sup>44</sup>. Assembled contigs were processed with the TransDecoder program ver. 3.0.1<sup>45</sup> to predict  
21 open reading frames (ORFs) and amino acid sequences. We used BLASTP and Pfam options for  
22 ORF predictions. To retain proteins of short length (e.g., neuropeptides), we kept ORFs of more than  
23 50 amino acids. Redundant ORFs were filtered using the CD-HIT program<sup>46</sup>. The quality of the

1 assembly was evaluated by the BUSCO program ver. 2<sup>47</sup> against a core-vertebrate gene (CVG) data  
2 set<sup>48</sup> and a vertebrate data set (Vertebrata\_odb9).

3

#### 4 **Gene annotation and ortholog analysis**

5 We searched homologs of predicted amino acid sequences using a BLASTP search  
6 against the NCBI non-redundant database (nr DB) [parameters: BLAST+ ver. 2.6.0; the nr DB was  
7 the latest version as of Nov 23, 2017]. Gene ontology (GO) terms for each sequence also were  
8 annotated using the BLAST2GO program (Version 4.1.9) with the NCBI nr DB<sup>49</sup>. To identify  
9 vertebrate orthologs of each newt amino acid sequence, orthologous groups within vertebrates were  
10 inferred using the OrthoFinder2 program (version 2.0.0)<sup>50</sup>. In this ortholog analysis, we used 10  
11 vertebrate species: green anole (*Anolis carolinensis*), zebrafish (*Danio rerio*), chicken (*Gallus*  
12 *gallus*), human (*Homo sapiens*), coelacanth (*Latimeria chalumnae*), mouse (*Mus musculus*), Iberian  
13 ribbed newt (*P. walli*), Chinese softshell turtle (*Pelodiscus sinensis*), African clawed frog (*Xenopus*  
14 *laevis*), and western clawed frog (*Xenopus tropicalis*). All of the protein sequences were downloaded  
15 from OrthoDB ver. 9.1, except that *X. laevis* sequences were obtained from Xenbase  
16 (<http://www.xenbase.org/other/static/ftpDatafiles.jsp>).

17

#### 18 **Expression and network analysis**

19 We quantified expression of each gene in each sample by mapping to the reference  
20 transcript database that was created by the *de novo* assembly (see above). The kallisto program  
21 v0.43.1 with 100 bootstrap replicates was used for mapping and counting<sup>51</sup>. The read count data  
22 were normalized by the trimmed mean M values (TMM) method available in the edgeR software  
23 package of R language (version 3.12.1)<sup>52</sup>. After TMM normalization, we estimated the Reads Per



1 Kilobase of exon per Million mapped reads (RPKM) value of each gene. We used RPKM values for  
2 the gene network analysis. To visualize profiles of gene expressions, the multi-dimensional scaling  
3 (MDS) plot was generated in the edgeR software package.

4 To detect modules of co-expressed genes among our sequencing data, weighted  
5 correlation network analysis (WGCNA) was applied. This method can identify co-expressed  
6 modules (e.g., tissue-specific gene groups) in huge data sets. Normalized RPKM data were utilized  
7 for this analysis, implemented in the WGCNA library of R language (version 1.51)<sup>53</sup> with specific  
8 parameter settings of power = 8, minModuleSize = 30, and maxBlockSize = 10000.

9

#### 10 **Identification of *bmp2/4/16***

11 To identify *P. waltl* *bmp* genes and infer phylogeny of this gene family among vertebrates,  
12 the corresponding predicted protein sequences were used to search the genome database described  
13 below. We searched the Ensembl database version 91<sup>54</sup> to identify *bmp* orthologs in 8 vertebrate  
14 species, and *X. tropicalis* v9.0 gene model in the Xenbase were also searched<sup>55</sup>. Additionally, we  
15 searched three independent urodele amphibian-specific data sets that were described in previous  
16 reports, including those for *Nanorana parkeri*<sup>56</sup>, *Ambystoma mexicanum*<sup>57</sup>, and *C. pyrrhogaster*<sup>58</sup>.  
17 Orthologous sequences encoded by *bmp* genes were aligned using the MUSCLE algorithm with  
18 default settings in the MEGA7 software<sup>59,60</sup>. A phylogenetic tree was constructed using the  
19 maximum-likelihood (ML) analysis implemented in MEGA7 with the JTT model and gamma  
20 distribution. Bootstrap probabilities were computed using 1,000 replicates.

21

## 1 **Results and Discussion**

### 2 **Collection and preparation of material**

3 We sought to create a comprehensive transcriptome reference covering the *P. waltl* gene  
4 repertoire, with the hope the resulting database will be useful for various subsequent studies.  
5 Therefore, we collected RNA samples from a wide variety of tissues and developmental stages (Fig.  
6 1 and Table 1). The 29 resulting libraries were derived from 11 different normal tissues (heart, limb,  
7 brain, kidney, pancreas, tail, testicular connective tissue, testis, testicular gland, and ovary) and two  
8 regenerating tissues (heart and limb) of adult newts or, from whole embryos at each of 9 time points  
9 from early to late developmental stages (unfertilized egg and stages 7-7.5, 8b, 11, 12, 15, 18, 25, and  
10 30).

11

### 12 **Sequencing and *de novo* assembly of transcriptome**

13 We sequenced the 29 libraries, each of which yielded 24 to 65 million of 100- to  
14 125-base paired-end reads, totaling more than 1.2 billion reads. To build a reference of *P. waltl*  
15 transcriptome, cleaned reads from all of these libraries were assembled together using Trinity,  
16 yielding 1,395,387 contigs with an average length and N<sub>50</sub> of 700.56 bp and 1,490 bp, respectively  
17 (Table 2, Supplementary Table 2). From these contigs, we predicted 202,788 non-redundant ORFs,  
18 ranging from 147 bp to 37.1 kb with an N<sub>50</sub> of 591 bp (Table 2, Supplementary Table 2). The ORF  
19 set was designated PLEWA04\_ORF and used as a reference *P. waltl* coding-sequence catalogue for  
20 downstream analysis.

21 We evaluated the completeness of our transcriptome by comparison (via the BUSCO  
22 program) with two different datasets (CVG and Vertebrata\_odb9). The CVG data consists of 233  
23 genes that are shared as one-to-one orthologs among 29 representative vertebrate genomes and are

1 widely used for phylogenomic studies<sup>61</sup>. We found that our *P. waltl* transcriptome covered all 233  
2 CVG genes, indicating that we successfully reconstructed most of the protein-coding gene sequences  
3 in this species. In addition, our *P. waltl* transcriptome corresponded to 98% of the Vertebrata\_odb9  
4 gene set. We compared our result with earlier urodele transcriptome studies. Previous *P. waltl* and *A.*  
5 *mexicanum* transcriptomes covered 82% and 88% of the Vertebrata\_odb9 data, respectively<sup>24,57</sup>.  
6 Thus, our *P. waltl* transcriptome data significantly enhanced the gene space of urodeles, attaining a  
7 near-complete gene repertoire.

8

### 9 **Gene annotation and ortholog analysis**

10 All translated sequences of PLEWA04\_ORF were compared with the NCBI  
11 non-redundant protein database (nr DB) using BLASTP. Among the 202,788 ORFs identified in our  
12 DB, 121,837 genes (60.1%) encoded proteins exhibiting sequence similarity to proteins in the NCBI  
13 nr DB (Supplementary Data 1: <https://doi.org/10.6084/m9.figshare.c.4237406.v1>). The two  
14 most-frequent BLASTP top hit species corresponded to clawed frogs (*X. tropicalis* and *X. laevis*),  
15 followed by coelacanth (*L. chalumnae*) and turtles (*C. picta*, *P. sinensis*, and *C. mydas*) (Table 3).  
16 We used InterProScan to query the predicted coding regions for known functional domains. We  
17 identified 90,471 Pfam motifs (Supplementary Data 2:  
18 <https://doi.org/10.6084/m9.figshare.c.4237406.v1>) in the products of 55,075 *P. waltl* gene models. In  
19 addition, 814,803 GO terms were assigned to 86,516 genes (42.7%) (Supplementary Data 3:  
20 <https://doi.org/10.6084/m9.figshare.c.4237406.v1>).

21 To understand global gene content evolution in the *P. waltl* proteome, we generated  
22 clusters of orthologous and paralogous gene families comparing the *P. waltl* proteome with those of  
23 9 other vertebrates (Table 4). The OrthoFinder program identified 18,559 orthogroups consisting of  
24 215,304 genes. The *P. waltl* proteome was clustered into 15,923 orthogroups, among which 13,283  
25 and 14,183 groups were shared with human and *X. laevis*, respectively (Table 4; Fig. 2). We found  
26 660 orthologous groups, consisting of 2,958 genes, that are unique to *P. waltl*; these loci presumably

1 represent evolutionarily young genes or loci that have undergone considerable divergence following  
2 gene duplications. These lineage-specific genes might account for the traits unique to *P. waltl*.  
3 Additionally, we found 784 orthologous groups that are shared only among amphibians (*P. waltl*,  
4 and *X. tropicalis*).

5 Salamanders are another group of urodele amphibians. We compared our *P. waltl*  
6 transcriptome with that of axolotl and identified 22,907 orthologous groups from the pairwise  
7 comparison. These two species shared 22,307 orthologous groups, while retaining 321 and 279  
8 species-specific groups, respectively (Supplementary figure 1). In both organisms, these  
9 species-specific groups often contained LINE elements. Previous reports have shown that LINE  
10 elements are abundant in urodele amphibian genomes<sup>24,26</sup>. Thus, we speculated that genes containing  
11 LINE elements have evolved more rapidly, accumulating lineage-specific mutations as a result of  
12 retrotransposition events. These LINE elements might be related to species-specific regeneration  
13 abilities, given that LINE elements are known to be activated during salamander limb regeneration<sup>62</sup>,  
14 although the functional contribution of these loci in regeneration remains hypothetical.

15

### 16 **Gene co-expression pattern analysis**

17 We quantified gene expression and profiled the expression patterns across all of the samples  
18 examined. A multi-dimensional scaling (MDS) plot of the 29 samples was used to depict the  
19 transcriptome similarities among the samples (Fig. 3). Samples derived from differentiated  
20 tissues/organs of adults (red dots in Fig. 3) yielded transcriptomes that were clearly distinct from  
21 those of samples from developing embryos (blue dots in Fig. 3). Samples at similar developmental  
22 stages clustered closer to each other than to those of differentiated tissues/organs; samples derived  
23 from the amputation experiments clustered on the MDS plot based on the amputated tissue. Notably,

1 directional distances on the dimension-2 axis indicated a continuum in the direction of changes that  
2 was consistent with developmental progression. Specifically, the embryonic samples were clearly  
3 ordered along the dimension-2 axis from unfertilized egg to gastrula to neurula to tail-bud stage,  
4 implying that gene expression gradually changes with progression during embryogenesis.

5 To understand the co-expression relationships between genes at a systems level, we  
6 performed WGCNA. This unsupervised and unbiased analysis identified distinct co-expression  
7 modules corresponding to clusters of correlated transcripts (Fig. 4). WGCNA identified 21  
8 co-expressed modules from the expression data spanning 29 samples; each module contained 53 to  
9 3283 co-expressed genes (Fig. 5). Each module represents genes with highly correlated expression  
10 profiles, either in a single tissue or in a narrow window of developmental stages. Out of 21 modules,  
11 11 represent a tissue-specific pattern in the adult tissues: the modules indicated by different colors  
12 represent different tissues (blue, brown, red, black, pink, green, yellow, cyan, light green, green,  
13 grey, and royal blue for testis, ovary, intestine, pancreas, liver, testicular gland, brain, tail, heart,  
14 testicular connective tissue, and kidney-specific expression patterns, respectively) (Fig. 5A). Six  
15 modules were embryonic (Fig. 5B). The turquoise module was composed of 3283 genes whose  
16 expression was observed only in unfertilized eggs, representing maternal transcripts that functioned  
17 in the early stages during *P. waltil* embryogenesis. On the other hand, modules indicated in purple,  
18 yellow, dark red, midnight blue, and light yellow to genes exhibiting zygotic co-expression after the  
19 mid-blastula transition (MBT; St 6-7), with the modules representing a progressive pattern showing  
20 peaks at St 8b-12, St 15, St 18, St 25-30 and St 30, respectively. In the regeneration experiments,  
21 limb-enriched genes were clustered into three modules based on a pattern corresponding to the  
22 responsiveness to amputation treatment: genes designated in salmon, magenta, and light cyan  
23 showed peaks at 0, 3, and 19 days post amputation (dpa) (Fig. 5C).

1

## 2 **Major signaling pathways**

3 Cell signaling pathways are essential for embryogenesis and organogenesis and are highly  
4 conserved in vertebrates. We inspected the gene repertoire of major signal-factor encoding genes  
5 and analyzed these expression patterns at the various developmental stages (Supplementary figure 2).

6 It turned out that the repertoire of signaling genes of *P. waltl* is typical for vertebrates, but we found  
7 a few cases of urodele amphibian-specific gene losses and duplications. An example is *bmp* gene  
8 family. Orthologs of *bmp2*, *bmp7*, and *bmp16* but not of *bmp4*<sub>2</sub> were identified in the transcriptome  
9 of *P. waltl*. Furthermore, no orthologs of *bmp4* were identified in the transcriptomes of two other  
10 urodeles, *A. mexicanum*, and *C. pyrrhogaster* (Fig. 6). Although *bmp16* has been thought to be  
11 confined to only teleost fish species<sup>63</sup>, we found urodele *bmp16* with accompanying ortholog of  
12 reptile *A. carolinesis*. Thus, our phylogenetic analysis suggested that urodeles and anurans have lost  
13 *bmp4* and *bmp16*, respectively, in each lineage. In the anuran *Xenopus* species, *bmp2* is maternally  
14 expressed, and *bmp4* and *bmp7* are zygotically expressed<sup>55,64</sup>. *bmp7* and *bmp2* showed high- and  
15 low-level maternal expression (respectively) in *P. waltl* (Supplementary figure 2D), suggesting that  
16 the functions of *bmp2*, *bmp4*, and *bmp7* are redundant in amphibian species. Expression of *P. waltl*  
17 *bmp16* was not apparent in early developmental stages (Supplementary figure 2D). The *wnt* gene  
18 family set is conserved in *P. waltl* as in other vertebrates. But we detected two additional paralogous  
19 genes encoding Wnt ligands, *wnt11b* and *wnt7-like* (Supplementary figure 2A); we postulate that  
20 these additional loci were generated by duplication in the lineage leading to *P. waltl*. In vertebrates,  
21 six highly conserved *igfbp*-family genes are typically observed, and *P. waltl* has all six *igfbp*  
22 orthologous genes (Supplementary figure 2E), while *Xenopus* lacks *igfbp3* and *igfbp6* orthologs<sup>65</sup>.

23 In sum, most of the orthologous genes for major signal molecules were identified in *P. waltl*,

1 which therefore harbors a gene repertoire typical of vertebrates, with a few exceptions. The  
2 expression patterns of the signaling molecule-encoding genes of *P. waltl* sometimes differed from  
3 those of *Xenopus* species. Further research on these differences is expected to expand our  
4 understanding of the evolution and development of amphibians.

5

## 6 **Hox genes and their expression dynamics during embryogenesis**

7 In tetrapod genomes, approximately 40 *hox* genes are present and organized into four *hox*  
8 clusters. In amphibians, the genes encoding Hoxb13 and Hoxd12 have been lost, while the  
9 Hoxc3-encoding gene is retained<sup>66</sup>. No *hoxc1* ortholog has been identified in amphibians, with the  
10 exception of caecillians<sup>67</sup>. The genome of the diploid *X. tropicalis* and the allotetraploid *X. laevis*  
11 harbors 38 and 75 functional *hox* genes, respectively<sup>68</sup>. Thus, usual amphibians appear to have  
12 retained 38 *hox* genes per diploid genome. Consistent with this observation, we identified a complete  
13 set of all of the *hox* gene orthologs in the *P. waltl* transcriptome (Fig. 7).

14 The expression profile of the *P. waltl* *hox* genes during embryogenesis was similar to those of  
15 axolotl and *Xenopus*, suggesting that the regulation of this gene family is conserved among  
16 amphibians (Fig. 7)<sup>66,68</sup>. Anterior *hox* genes were activated starting around the time of the MBT;  
17 posterior *hox* genes were gradually up-regulated at the late embryonic stage, reflecting their  
18 spatio-temporal collinearity during embryogenesis. Interestingly, *hoxd1* of *P. waltl* was found to be  
19 stored as a maternal mRNA at the oocyte and one-cell stage (Fig. 7), whereas the orthologous genes  
20 were expressed after MBT in axolotl and *Xenopus*<sup>66,68,69</sup>.

21 The correlation between newt genomic gigantism and remarkable regenerative ability has been  
22 interpreted to suggest that the genome of a prototypical newt underwent species-specific whole  
23 genome duplication. Because *hox* genes are maintained as highly conserved gene clusters in

1 vertebrate genomes, the number of *hox* clusters usually reflects the number of whole genome  
2 duplications each genome experienced during evolution<sup>70</sup>. In our *P. waltl* gene repertoire, we only  
3 found one-to-one orthologs of *hox* genes when comparing among available amphibian genes. This  
4 result suggested that the newt genome did not undergo additional whole genome duplication.  
5 Similarly, the recently published axolotl giant genome showed no evidence for additional whole  
6 genome duplication; instead, the axolotl genome has a correspondingly enlarged genic component,  
7 primarily due to the presence of especially long introns<sup>24,26,71</sup>. In the salamander genome, expansion  
8 of LTR retrotransposons also contributes to genome gigantism<sup>72</sup>. Such mechanisms also may have  
9 contributed to newt genome gigantism and may be related to the incredible regenerative ability of  
10 this species.

11

## 12 **Transcriptomic features of regenerating limbs**

13 Numerous developmental pathway genes have been reported to be reactivated during  
14 limb regeneration. For example, *hox13*-paralogous genes are expressed in distal regions of  
15 developing and regenerating amphibian limbs<sup>73-76</sup>. Indeed, the present work confirmed the  
16 reactivation of the *hoxa/c/d13* genes in regenerating *P. waltl* forelimb at 19 dpa, when the blastema  
17 is fully formed (Fig. 8A). Other transcription factor-encoding genes known to be involved in limb  
18 development and regeneration (*msx1*, *msx2*, *prrx1*, *prrx2*, *tbx5*, and *hand2*) also were drastically  
19 up-regulated at 19 dpa, indicating that the transcriptome defined here successfully recaptured the  
20 expression pattern of limb regeneration (Fig. 8A). Consistent with the reports in axolotl<sup>57</sup>, genes  
21 encoding RNA-binding proteins (*rbmx*, *hnrnpa1*, and *sfrs1*), matrix metalloproteinases (*mmp3* and  
22 *mmp11*), and a novel proteinase inhibitor (*kazald1*) were up-regulated in regenerating limb at 19 dpa



1 in *P. waltl* (Supplementary figure 3). These results suggested that these genes are commonly  
2 involved in regeneration in the two urodele amphibians.

3 Intriguingly, WGCNA revealed a unique transcriptomic feature of regeneration (Fig. 5; light  
4 cyan symbols). The light cyan module contained 274 genes that are co-regulated in regenerating  
5 limb at 19 dpa (Fig. 8B). Notably, this module included 69 ribosomal protein-encoding genes (Fig.  
6 8B). These transcripts typically were not detected in other tissues and organs, suggesting that these  
7 ribosomal protein-encoding genes are likely to have be limb- or regeneration-specific roles. These  
8 ribosomal proteins may contribute to organ remodeling *via* regeneration-specific protein synthesis.  
9 Consistent with this inference, the expression of ribosomal proteins is down-regulated in *Xenopus*  
10 spinal cord regeneration at the non-regenerative stage after metamorphosis<sup>77</sup>.

11 Axolotl is another good model organism of regeneration; that organism also is a urodele  
12 amphibian, and the axolotl genome was recently reported<sup>26</sup>. Axolotl is a neotenic animal, that is, one  
13 that retains aspects of the larval state even after sexual maturation<sup>12</sup>. Interestingly, axolotl shows  
14 restricted regenerative capacity compared to newts<sup>24</sup>. How did such differences in metamorphosis  
15 and regenerative capacity arise despite the closely related nature of these species? Our near-complete  
16 *P. waltl* gene catalogue, together with the recently reported *P. waltl* draft genome sequence<sup>24</sup>, is  
17 expected to facilitate genome-wide comparisons between these two model urodele amphibians.

18

## 19 **Conclusions**

20 In the present study, we built a reference gene catalogue of *P. waltl* using transcriptome  
21 data sets generated from a wide variety of samples. As a BUSCO analysis showed, our gene models  
22 appear to cover most of the protein coding genes on the newt genome. The near-complete gene

1 catalogue and the associated information will be valuable resources for any researchers to use *P.*  
2 *waltl*. To share the resources in the community, we established a portal website, designated iNewt  
3 (<http://www.nibb.ac.jp/imori/main/>), where these transcriptome data such as gene models,  
4 annotations and expression profiles can be obtained. The portal site also permits BLAST searches  
5 against the data set. With these references, *P. waltl* is promising to serve a good model to expand our  
6 understanding of molecular mechanisms underlying regeneration. Given the newts' unique  
7 biological properties, we further expect that our reference gene catalogue, together with the  
8 technique of highly efficient CRISPR/Cas9 genome editing<sup>41</sup>, will open new avenues for researches  
9 using *P. waltl* besides regeneration which includes developmental biology, stem cell biology, cancer  
10 research, reproductive biology, evolutionary biology, ethology, and toxico-genomics.

11

12

### 13 **Acknowledgments**

14 This work was supported by MEXT/JSPS KAKENHI (Grant Numbers JP16H01254 TH,  
15 JP16K08467 TH, JP17J04796 MS, JP16K18613 MM, JP17K14980 YH, JP16H04794 TT,  
16 JP15K06802 KTS) and Grant for Basic Science Research Projects of the Sumitomo Foundation to  
17 MM (No. 170845), and Chuo University Personal Research Grant to AF. This work was also  
18 supported by NIBB Collaborative Research Program (17-431, 18-204) and computations were  
19 partially performed on the NIG supercomputer at ROIS. Kyorin Corporation (Hyogo, Japan) kindly  
20 provided the feeds for the newts.

21

## 1   **References**

- 2   1. Spemann, H., and Mangold, O. 1924, Über Induktion von Embryonalanlagen durch  
3        Implantation artfremder Organisatoren, Arch. Mikrosk. Anat. En., 100, 599–638
- 4   2. Wolff, G. 1895, Entwicklungsphysiologische Studien 1. Die regeneration der Urodelenlinse,  
5        Wilhelm Roux's Arch. Entwined Meghan Org., 1, 380-390.
- 6   3. Eguchi, G., Abe, S. I., and Watanabe, K. 1974, Differentiation of lens-like structures from newt  
7        iris epithelial cells in vitro, Proc. Natl. Acad. Sci. U S A, 71, 5052-5056.
- 8   4. Agata, K., and Inoue, T. 2012, Survey of the differences between regenerative and  
9        non-regenerative animals, Dev Growth Differ 54, 143-152.
- 10  5. Hayashi, T., Mizuno, N., and Kondoh, H. 2008, Determinative roles of FGF and Wnt signals in  
11        iris-derived lens regeneration in newt eye, Dev. Growth. Differ., 50, 279-287.
- 12  6. Inoue, T., Inoue, R., Tsutsumi, R., Tada, K., Urata, Y., Michibayashi, C. et al. 2012, Lens  
13        regenerates by means of similar processes and timeline in adults and larvae of the newt  
14        *Cynops pyrrhogaster*, Dev. Dyn., 241, 1575-1583.
- 15  7. Maki, N., Takechi, K., Sano, S., Tarui, H., Sasai, Y., and Agata, K. 2007, Rapid accumulation of  
16        nucleostemin in nucleolus during newt regeneration, Dev. Dyn., 236, 941-950.
- 17  8. Maki, N., Tsonis, P. A., and Agata, K. 2010, Changes in global histone modifications during  
18        dedifferentiation in newt lens regeneration, Mol. Vis., 16, 1893-1897.
- 19  9. Brockes, J. P. 1997, Amphibian limb regeneration: rebuilding a complex structure', Science, 276,  
20        81-87.
- 21  10. Tsutsumi, R., Inoue, T., Yamada, S., and Agata, K. 2015, Reintegration of the regenerated and  
22        the remaining tissues during joint regeneration in the newt *Cynops pyrrhogaster*,  
23        Regeneration (Oxf), 2, 26-36.

- 1 11. Mercer, S. E., Odelberg, S. J., and Simon, H. G. 2013, A dynamic spatiotemporal extracellular  
2 matrix facilitates epicardial-mediated vertebrate heart regeneration, *Dev. Biol.*, 382,  
3 457-469.
- 4 12. Kurosaka, H., Takano-Yamamoto, T., Yamashiro, T., and Agata, K. 2008, Comparison of  
5 molecular and cellular events during lower jaw regeneration of newt (*Cynops pyrrhogaster*)  
6 and West African clawed frog (*Xenopus tropicalis*), *Dev. Dyn.*, 237, 354-365.
- 7 13. Ikegami, Y., Mitsuda, S., and Araki, M. 2002, Neural cell differentiation from retinal pigment  
8 epithelial cells of the newt: an organ culture model for the urodele retinal regeneration, *J.*  
9 *Neurobiol.*, 50, 209-220.
- 10 14. Chiba, C., Oi, H., and Saito, T. 2005, Changes in somatic sodium currents of ganglion cells  
11 during retinal regeneration in the adult newt, *Brain Res. Dev. Brain Res.*, 154, 25-34.
- 12 15. Okamoto, M., Ohsawa, H., Hayashi, T., Owaribe, K., and Tsonis, P. A. 2007, Regeneration of  
13 retinotectal projections after optic tectum removal in adult newts, *Mol. Vis.*, 13, 2112-2118.
- 14 16. Berg, D. A., Kirkham, M., Beljajeva, A., Knapp, D., Habermann, B., Ryge, J. et al. 2010,  
15 Efficient regeneration by activation of neurogenesis in homeostatically quiescent regions of  
16 the adult vertebrate brain, *Development*, 137, 4127-4134.
- 17 17. Urata, Y., Yamashita, W., Inoue, T., and Agata, K. 2018, Spatio-temporal neural stem cell  
18 behavior leads to both perfect and imperfect structural brain regeneration in adult newts,  
19 *Biol. Open*, 7 (6).
- 20 18. Zhang, F., Clarke, J. D., Santos-Ruiz, L., and Ferretti, P. 2002, Differential regulation of  
21 fibroblast growth factor receptors in the regenerating amphibian spinal cord in vivo,  
22 *Neuroscience*, 114, 837-848.

- 1 19. Grubb, R. B. 1975, An autoradiographic study of the origin of intestinal blastemal cells in the  
2 newt, *Notophthalmus viridescens*, Dev. Biol., 47, 185-195.
- 3 20. Uchida, T., and Hanaoka, K. I., 1949, The occurrence of oviform cells by hormonal injection in  
4 the regenerated testes of a newt, Cytologia, 15, 109–130.
- 5 21. Flament, S., Dumond, H., Chardard, D., and Chesnel, A. 2009, Lifelong testicular differentiation  
6 in *Pleurodeles waltl* (Amphibia, Caudata), Reprod. Biol. Endocrinol., 7, 21.
- 7 22. Romanova, 1959, Regenerating potential of a hypertrophied lung in *Triturus cristatus*, Biull.  
8 Eksp. Biol. Med., 47, 89-94.
- 9 23. Tsutsumi, R., Yamada, S., and Agata, K. 2016, Functional joint regeneration is achieved using  
10 reintegration mechanism in *Xenopus laevis*, Regeneration (Oxf), 3, 26-38.
- 11 24. Elewa, A., Wang, H., Talavera-López, C., Joven, A., Brito, G., Kumar, A., et al. 2017. Reading  
12 and editing the *Pleurodeles waltl* genome reveals novel features of tetrapod regeneration.  
13 Nat. Commun., 8, 2286.
- 14 25. Gregory, T. R. 2005, Synergy between sequence and size in large-scale genomics, Nat. Rev.  
15 Genet., 6, 699-708.
- 16 26. Nowoshilow, S., Schloissnig, S., Fei, J.F., Dahl, A., Pang, A.W.C., Pippel, M., et al. 2018, The  
17 axolotl genome and the evolution of key tissue formation regulators, Nature 554, 50-55.
- 18 27. Ingram, A. J. 1972, The lethal and hepatocarcinogenic effects of dimethylnitrosamine injection  
19 in the newt *Triturus helveticus*, Br. J. Cancer, 26, 206-215.
- 20 28. Okamoto, M. 1997, Simultaneous demonstration of lens regeneration from dorsal iris and tumour  
21 production from ventral iris in the same newt eye after carcinogen administration,  
22 Differentiation, 61, 285-92.

- 1 29. Ueno, T., Ohgami, T., Harada, Y., Ueno, S., Iwao, Y. 2014, Egg activation in physiologically  
2 polyspermic newt eggs: involvement of IP<sub>3</sub> receptor, PLC $\gamma$ , and microtubules in calcium  
3 wave induction, *Int. J. Dev. Biol.*, 58, 315-323.
- 4 30. Uribe, M.C., and Mejía-Roa, V. 2014, Testicular structure and germ cells morphology in  
5 salamanders. *Spermatogenesis* 4, e988090.
- 6 31. Kikuyama, S., Toyoda, F., Ohmiya, Y., Matsuda, K., Tanaka, S., and Hayashi, H. 1995,  
7 Sodefrin: a female-attracting peptide pheromone in newt cloacal glands, *Science*, 267  
8 (5204), 1643-1645.
- 9 32. Nakada, T., Toyoda, F., Matsuda, K., Nakakura, T., Hasunuma, I., Yamamoto, K., et al. 2017,  
10 Imorin: a sexual attractiveness pheromone in female red-bellied newts (*Cynops*  
11 *pyrrhogaster*), *Sci. Rep.*, 7, 41334.
- 12 33. Mouchet, F., Gauthier, L., Mailhes, C., Ferrier, V., and Devaux, A. 2006, Comparative  
13 evaluation of genotoxicity of captan in amphibian larvae (*Xenopus laevis* and *Pleurodeles*  
14 *waltl*) using the comet assay and the micronucleus test, *Environ. Toxicol.* 21, 264-277.
- 15 34. Mouchet, F., Gauthier, L., Baudrimont, M., Gonzalez, P., Mailhes, C., Ferrier, V., et al. 2007,  
16 'Comparative evaluation of the toxicity and genotoxicity of cadmium in amphibian larvae  
17 (*Xenopus laevis* and *Pleurodeles waltl*) using the comet assay and the micronucleus test',  
18 *Environ. Toxicol.*, 22, 422-435.
- 19 35. Hirako, A., Takeoka, Y., Hayashi, T., Takeuchi, T., Furukawa, S., and Sugiyama, A. 2017,  
20 Effects of cadmium exposure on Iberian ribbed newt, *J. Toxicol. Pathol.* 30, 345-350.
- 21 36. BOUR, A., Mouchet, F., Cadarsi, S., Silvestre, J., Verneuil, L., Baqué, D. et al. 2016, Toxicity of  
22 CeO<sub>2</sub> nanoparticles on a freshwater experimental trophic chain: A study in environmentally  
23 relevant conditions through the use of mesocosms, *Nanotoxicology*, 10, 245-255.

- 1 37. Makita, R., Kondoh, H., and Okamoto, M. 1995, Transgenesis of newt with exogenous gene  
2 expression facilitated by satellite 2 repeats, *Dev. Growth and Differ.*, 37, 605-616.
- 3 38. Ueda, Y., Kondoh, H., and Mizuno, N. 2005, Generation of transgenic newt *Cynops*  
4 *pyrrhogaster* for regeneration study, *Genesis* 41, 87-98.
- 5 39. Hayashi, T., Yokotani, N., Tane, S., Matsumoto, A., Myouga, A., Okamoto, M. et al. 2013,  
6 Molecular genetic system for regenerative studies using newts, *Dev. Growth Differ.* 55,  
7 229-236.
- 8 40. Hayashi, T., Sakamoto, K., Sakuma, T., Yokotani, N., Inoue, T., Kawaguchi, E. et al. 2014,  
9 Transcription activator-like effector nucleases efficiently disrupt the target gene in Iberian  
10 ribbed newts (*Pleurodeles waltl*), an experimental model animal for regeneration, *Dev.*  
11 *Growth Differ.* 56, 115-121.
- 12 41. Suzuki, M., Hayashi, T., Inoue, T., Agata, T., Hirayama, T., Suzuki, T. et al. 2018, Cas9  
13 ribonucleoprotein complex allows direct and rapid analysis of coding and noncoding regions  
14 of target genes in *Pleurodeles waltl* development and regeneration. *Dev. Biol.*, in press.
- 15 42. Shi, D.L. and Boucaut, J.C. 1995, The chronological development of the urodele amphibian  
16 *Pleurodeles waltl* (Michah). *Int. J. Dev. Biol.* 39, 427-441.
- 17 43. Grabherr, M. G., Haas, B. J., Yassour, M., Levin, J. Z., Thompson, D. A., Amit, I. et al. 2011,  
18 Full-length transcriptome assembly from RNA-Seq data without a reference genome, *Nat.*  
19 *Biotechnol.*, 29, 644-652.
- 20 44. Bolger, A.M., Lohse, M., and Usadel, B. 2014, Trimmomatic: a flexible trimmer for Illumina  
21 sequence data, *Bioinformatics*, 30, 2114-2120.

- 1 45. Haas, B. J., Papanicolaou, A., Yassour, M., Grabherr, M., Blood, P. D., Bowden, J. et al. 2013,  
2 De novo transcript sequence reconstruction from RNA-seq using the Trinity platform for  
3 reference generation and analysis, *Nat. Protoc.*, 8, 1494-1512.
- 4 46. Fu, L., Niu, B., Zhu, Z., Wu, S., and Li, W. 2012, CD-HIT: accelerated for clustering the  
5 next-generation sequencing data, *Bioinformatics*, 28, 3150-3152.
- 6 47. Simão, F.A., Waterhouse, R.M., Ioannidis, P., Kriventseva, E.V., and Zdobnov, E.M. 2015,  
7 BUSCO: assessing genome assembly and annotation completeness with single-copy  
8 orthologs, *Bioinformatics*, 31, 3210-3212.
- 9 48. Hara, Y., Tatsumi, K., Yoshida, M., Kajikawa, E., Kiyonari, H., and Kuraku, S. 2015,  
10 Optimizing and benchmarking de novo transcriptome sequencing: from library preparation  
11 to assembly evaluation. *BMC Genomics*, 16, 977.
- 12 49. Götz, S., García-Gómez, J.M., Terol, J., Williams, T.D., Nagaraj, S.H., Nueda, M.J. et al. 2008,  
13 High-throughput functional annotation and data mining with the Blast2GO suite. *Nucleic  
14 Acids Res.*, 36, 3420-3435.
- 15 50. Emms, D.M. and Kelly, S. 2015, OrthoFinder: solving fundamental biases in whole genome  
16 comparisons dramatically improves orthogroup inference accuracy, *Genome Biol.*, 16, 157.
- 17 51. Bray, N.L., Pimentel, H., Melsted, P., and Pachter, L. 2016, Near-optimal probabilistic RNA-seq  
18 quantification, *Nat. Biotechnol.*, 34, 525-527.
- 19 52. Robinson, M.D., McCarthy, D.J., and Smyth, G.K. 2010, edgeR: a Bioconductor package for  
20 differential expression analysis of digital gene expression data, *Bioinformatics*, 26, 139-140.
- 21 53. Langfelder, P. and Horvath, S. 2008, WGCNA: an R package for weighted correlation network  
22 analysis. *BMC Bioinformatics*, 9, 559.



- 1 54. Zerbino, D. R., Achuthan, P., Akanni, W., Amode, M. R., Barrell, D., Bhai, J. et al. 2018,  
2 Ensembl 2018, *Nucleic Acids Res.*, 46 (D1), D754-D61.
- 3 55. Session, A. M., Uno, Y., Kwon, T., Chapman, J. A., Toyoda, A., Takahashi, S. et al. 2016,  
4 Genome evolution in the allotetraploid frog *Xenopus laevis*, *Nature*, 538, 336-343.
- 5 56. Sun, Y. B., Xiong, Z. J., Xiang, X. Y., Liu, S. P., Zhou, W. W., Tu, X. L. et al. 2015,  
6 Whole-genome sequence of the Tibetan frog *Nanorana parkeri* and the comparative  
7 evolution of tetrapod genomes, *Proc. Natl. Acad. Sci. U S A*, 112, E1257-62.
- 8 57. Bryant, D.M., Johnson, K., DiTommaso, T., Tickle, T., Couger, M.B., Payzin-Dogru, D., Lee,  
9 T.J., Leigh, N.D., Kuo, T.H., Davis, F.G., *et al.* (2017). A Tissue-Mapped Axolotl De Novo  
10 Transcriptome Enables Identification of Limb Regeneration Factors. *Cell Rep* 18, 762-776.
- 11 58. Nakamura, K., Islam, M. R., Takayanagi, M., Yasumuro, H., Inami, W., Kunahong, A. et al.  
12 2014, A transcriptome for the study of early processes of retinal regeneration in the adult  
13 newt, *Cynops pyrrhogaster*, *PLoS One*, 9, e109831.
- 14 59. Edgar, R. C. 2004, MUSCLE: multiple sequence alignment with high accuracy and high  
15 throughput, *Nucleic Acids Res.*, 32, 1792-1797.
- 16 60. Kumar, S., Stecher, G., and Tamura, K. 2016, MEGA7: Molecular Evolutionary Genetics  
17 Analysis Version 7.0 for Bigger Datasets, *Mol. Biol. Evol.*, 33, 1870-1874.
- 18 61. Irisarri, I., Baurain, D., Brinkmann, H., Delsuc, F., Sire, J. Y., Kupfer, A. et al. 2017,  
19 Phylotranscriptomic consolidation of the jawed vertebrate timetree, *Nat. Ecol. Evol.* 1,  
20 1370-1378.
- 21 62. Zhu, W., Kuo, D., Nathanson, J., Satoh, A., Pao, G. M., Yeo, G. W. et al. 2012, Retrotransposon  
22 long interspersed nucleotide element-1 (LINE-1) is activated during salamander limb  
23 regeneration, *Dev. Growth Differ.*, 54, 673-685.

- 1 63. Feiner, N., Begemann, G., Renz, A. J., Meyer, A., Kuraku, S. 2009, The origin of bmp16, a  
2 novel Bmp2/4 relative, retained in teleost fish genomes, BMC. Evol. Biol., 9, 277.
- 3 64. Owens, N. D. L., Blitz, I. L., Lane, M. A., Patrushev, I., Overton, J. D., Gilchrist, M. J. et al.  
4 2016, Measuring Absolute RNA Copy Numbers at High Temporal Resolution Reveals  
5 Transcriptome Kinetics in Development, Cell. Rep., 14, 632-647.
- 6 65. Haramoto, Y., Oshima, T., Takahashi, S., and Ito, Y. 2014, Characterization of the insulin-like  
7 growth factor binding protein family in *Xenopus tropicalis*, Int. J. Dev. Biol., 58, 705-711.
- 8 66. Jiang, P., Nelson, J. D., Leng, N., Collins, M., Swanson, S., Dewey, C. N. et al. 2017, Analysis  
9 of embryonic development in the unsequenced axolotl: Waves of transcriptomic upheaval  
10 and stability, Dev. Biol., 426, 143-154.
- 11 67. Wu, R., Liu, Q., Meng, S., Zhang, P., and Liang, D. 2015, Hox cluster characterization of Banna  
12 caecilian (*Ichthyophis bannanicus*) provides hints for slow evolution of its genome, BMC  
13 Genomics, 16, 468.
- 14 68. Kondo, M., Kondo, M., Yamamoto, T., Takahashi, S., and Taira, M. 2017, Comprehensive  
15 analyses of hox gene expression in *Xenopus laevis* embryos and adult tissues, Dev. Growth  
16 Differ., 59, 526-539.
- 17 69. Wacker, S. A., Jansen, H. J., McNulty, C. L., Houtzager, E., and Durston, A. J. 2004, Timed  
18 interactions between the Hox expressing non-organiser mesoderm and the Spemann  
19 organiser generate positional information during vertebrate gastrulation, Dev. Biol., 268,  
20 207-219.
- 21 70. Putnam, N. H., Butts, T., Ferrier, D. E., Furlong, R. F., Hellsten, U., Kawashima, T. et al. 2008,  
22 'The amphioxus genome and the evolution of the chordate karyotype', Nature, 453,  
23 1064-1071.

- 1 71. Smith, J. J., Putta, S., Zhu, W., Pao, G. M., Verma, I. M., Hunter, T. et al. 2009, Genic regions of  
2 a large salamander genome contain long introns and novel genes, *BMC Genomics*, 10, 19.
- 3 72. Sun, C., Shepard, D. B., Chong, R. A., López Arriaza, J., Hall, K., Castoe, T. A. et al. 2012, LTR  
4 retrotransposons contribute to genomic gigantism in plethodontid salamanders, *Genome*  
5 *Biol. Evol.*, 4, 168-183.
- 6 73. Gardiner, D.M., Blumberg, B., Komine, Y., and Bryant, S.V. 1995, Regulation of HoxA  
7 expression in developing and regenerating axolotl limbs, *Development*, 121, 1731-1741.
- 8 74. Endo, T., Tamura, K., and Ide, H. 2000, Analysis of gene expressions during *Xenopus* forelimb  
9 regeneration, *Dev. Biol.*, 220, 296-306.
- 10 75. Beck, C.W., Christen, B., and Slack, J.M. 2003, Molecular pathways needed for regeneration of  
11 spinal cord and muscle in a vertebrate, *Dev. Cell.*, 5, 429-439.
- 12 76. Satoh, A., Endo, T., Abe, M., Yakushiji, N., Ohgo, S., Tamura, K. et al. 2006, Characterization  
13 of *Xenopus* digits and regenerated limbs of the froglet, *Dev. Dyn.*, 235, 3316-3326.
- 14 77. Lee-Liu, D., Sun, L., Dovichi, N. J., Larraín, J. 2018, Quantitative Proteomics After Spinal Cord  
15 Injury (SCI) in a Regenerative and a Nonregenerative Stage in the Frog, *Mol. Cell.*  
16 *Proteomics*, 17, 592-606.

1 **Figure legends**

2 **Figure 1. Organs and embryos used for RNA preparation.** Panel A provides a picture of a whole  
3 adult female. (B-N) Examples of tissues and organs used for preparation of RNA. dpa: days post  
4 amputation. Scale bars: 1 mm.

5

6 **Figure 2. Venn diagram of shared and unique orthogroups in five vertebrates.** Orthogroups  
7 were identified by clustering of orthologous groups using OrthoFinder.

8

9 **Figure 3. MDS plot for RNA-Seq gene expression of *P. waltl* tissues, organs, and**  
10 **embryogenesis samples.** Multi-dimensional scaling (MDS) plot showing relatedness between  
11 transcript expression profiles of organs, tissues, and embryos of *P. waltl* at different developmental  
12 stages. Red dots represent the expression profiles of adult tissues/organs and pink dots represent  
13 those of juveniles (3 or 7 months). The labels indicate the tissues and sources as follows, Br: brain  
14 (adult), Cn: connective tissue (3 months), It: intestine (adult), Kn: kidney (adult), Lv: liver (adult),  
15 Ov3: ovary (3 months), Ov7: ovary (7 months), Pc: pancreas (adult), Tg: testicular gland (adult),  
16 TtA: testis (adult), and Tt3: testis (3 months). Blue dots represent the expression profiles during  
17 embryogenesis. The labels indicate the stages as follows, Eg: unfertilized egg, St7: stage 7 (late  
18 blastula), St8b: stage 8b (early gastrula), St11: stage 11 (middle gastrula), St12: stage 12 (late  
19 gastrula), St15: stage 15 (neural plate stage), St18: stage 18 (late neural fold stage), St25: stage 25  
20 (tail-bud stage), and St30: stage 30 (gill protrusion stage). Yellow dots represent the expression  
21 profiles in the regeneration process after amputation, where the labels Lb0, Lb3, and Lb19 indicate  
22 limb or limb blastema expression profiles at 0, 3, and 19 dpa (respectively); HtR and HtN indicate  
23 expression profiles of the hearts regenerating after amputation and in unamputated controls

1 (respectively).

2

3 **Figure 4. Gene co-expression analysis of *P. waltl* transcriptome.** Hierarchical cluster tree of the *P.*  
4 *waltl* genes showing co-expression modules identified using WGCNA. Modules correspond to  
5 branches and are labelled by colors as indicated by the color band underneath the tree.

6

7 **Figure 5. Co-expression gene modules.** The co-expression gene modules identified using WGCNA  
8 are shown. Each grey dot represents the value of the respective module's Eigengene. The number at  
9 the top left in each panel indicates the number of genes belonging to a module exhibiting unique  
10 expression. The modules are classified into 4 categories based on the expression pattern: modules  
11 associated with (A) specific tissues/organs, (B) embryogenesis, (C) regeneration processes, and (D)  
12 others. The sample abbreviations indicated by labels at the bottom of each panel are defined in the  
13 Figure 3 legend.

14

15 **Figure 6. Phylogenetic tree of *bmp2/4/16* genes among vertebrates.** The phylogenetic tree was  
16 reconstructed using 34 vertebrate orthologs, including 12 *bmp4*, 15 *bmp2*, and 7 *bmp16* genes; an  
17 ascidian *bmp2/4* was used as the outgroup. The number at each node represents the bootstrap  
18 probability.

19

20 **Figure 7. Expression profile of *hox* genes during oogenesis and embryogenesis.** A total of 37 *hox*  
21 genes are listed from the assembly data of PLEWA04. The sample abbreviations indicated by labels  
22 at the bottom of each panel are t in the Figure 3 legend. Ovaries were sampled at three and six  
23 months after metamorphosis (Ov3 and Ov6, respectively). Note that *P. waltl* *hoxb13*, *hoxc1*, and

1 *hoxd12* orthologs were not identified from our transcriptome data. Most of the *hox* genes were  
2 zygotically activated; only the *hoxd1* mRNA was synthesized through oogenesis and stored at the  
3 one-cell stage. RPKM values of each gene are indicated as a color gradient on a  $\log_{10}$  scale, ranging  
4 from red (maximum) to white (minimum).

5

6 **Figure 8. Expression profile of regenerating limb-enriched genes.** (a) Expression of transcription  
7 factor-encoding genes involved in limb development during regeneration. The *hox13*, *msx1* and 2,  
8 *prrx1* and 2, *tbx5*, and *hand2* genes were significantly up-regulated in the forelimb at 19 dpa. RPKM  
9 values of each gene were determined from the assembly data of PLEWA04. (b) Details of  
10 co-expressed genes in regenerating limb at 19 dpa. A total of 274 genes in this WGCNA module  
11 (indicated by light cyan symbols in Fig. 5) were identified. Notably, genes encoding proteins of the  
12 large and small ribosomal subunits accounted for 25% (69 out of 274) of the genes in this module.

**Table 1.** Summary of the sample preparation and sequence profiles.

| label* | tissue/organ      | age/ dev. stage** | description                           | platform (Hiseq) | read length# | total reads |
|--------|-------------------|-------------------|---------------------------------------|------------------|--------------|-------------|
| HtN    | heart             | adult             | ventricle, normal                     | 2000             | 101 bp       | 55,882,914  |
| HtR    | heart             | adult             | ventricle, regenerating               | 2000             | 101 bp       | 50,516,110  |
| Lb0    | limb              | adult             | limb, normal                          | 2000             | 101 bp       | 55,246,408  |
| Lb3    | limb              | adult             | limb, regenerating day3               | 2000             | 101 bp       | 47,286,228  |
| Lb19   | limb              | adult             | limb, regenerating day19              | 2000             | 101 bp       | 64,373,580  |
| Tl     | tail              | adult             | tail                                  | 2500             | 125 bp       | 27,630,846  |
| Br     | brain             | adult             | brain                                 | 2500             | 125 bp       | 27,626,778  |
| Kn     | kidney            | adult             | kidney                                | 2500             | 125 bp       | 27,441,344  |
| Lv     | liver             | adult             | liver                                 | 2500             | 125 bp       | 30,427,600  |
| Pc     | pancreas          | adult             | pancreas                              | 2500             | 125 bp       | 24,594,822  |
| It     | intestine         | adult             | intestine                             | 2500             | 125 bp       | 28,214,656  |
| Cn     | connective tissue | 3 months juvenile | connective tissue adjacent to testis  | 2000             | 106 bp       | 34,403,376  |
| Tg     | testicular grand  | adult             | testicular grand, matured             | 2000             | 106 bp       | 33,182,908  |
| Tt3    | testis            | 3 months juvenile | testis, not matured                   | 2000             | 106 bp       | 36,052,648  |
| TtA    | testis            | adult             | testis, matured                       | 2000             | 106 bp       | 35,305,096  |
| Ov3    | ovary             | 3 months juvenile | ovary, not matured                    | 2000             | 106 bp       | 37,990,436  |
| Ov7    | ovary             | 7 months juvenile | ovary, not matured                    | 2000             | 106 bp       | 39,617,046  |
| Eg-1   | whole             | unfertilized egg  | biological replicate 1                | 2000             | 106 bp       | 35,758,440  |
| Eg-2   | whole             | unfertilized egg  | biological replicate 2                | 2000             | 106 bp       | 38,172,320  |
| St7    | whole embryo      | stage 7-7.5       | early gastrula                        | 2500             | 125 bp       | 29,361,580  |
| St8b   | whole embryo      | stage 8b          | slightly advanced early gastrula      | 1500             | 100 bp       | 65,423,479  |
| St11   | whole embryo      | stage 11          | middle-late gastrula                  | 2500             | 125 bp       | 31,400,058  |
| St12   | whole embryo      | stage 12          | late gastrula;                        | 1500             | 100 bp       | 55,684,175  |
| St15   | whole embryo      | stage 15          | neural plate stage                    | 1500             | 100 bp       | 48,604,306  |
| St18   | whole embryo      | stage 18          | late neural fold stage                | 1500             | 100 bp       | 55,446,723  |
| St25-1 | whole embryo      | stage 25          | elongated tail bud stage              | 1500             | 100 bp       | 49,345,987  |
| St25-2 | whole embryo      | stage 25          | tail bud stages (st25-28) were mixed. | 2000             | 101 bp       | 51,692,566  |
| St30-1 | whole embryo      | stage 30          | gill protrusion stage                 | 1500             | 100 bp       | 49,079,133  |
| St30-2 | whole embryo      | stage 30          | st30 and st31 were mixed.             | 2000             | 101 bp       | 49,920,498  |

\*: abbreviations correspond to the labels in Table1, Fig. 3, Fig.5, Fig.7 and Supple. Fig.2 and Supple. Fig.3 #: paired end.

**Table 2.** Over view of de novo assembly and ORF prediction.

|                            |                |
|----------------------------|----------------|
| <b>Number of samples</b>   | 26             |
| <b>de novo assembly</b>    |                |
| Total length               | 977,554,621 bp |
| N50                        | 1,490 bp       |
| Number of contigs          | 6440242        |
| <b>ORF prediction</b>      |                |
| Total length               | 113316939 bp   |
| N50                        | 591 bp         |
| Number of proteins         | 202788         |
| <b>BUSCO completeness*</b> | 99.0%          |

\*: including 1% of fragmented.



**Table 3.** Species of top BLAST hits in NCBI nr databases for the *P. waltl* transcriptome

| <b>species</b>                       | <b>common name</b>          | <b># top hits</b> |
|--------------------------------------|-----------------------------|-------------------|
| <i>X. tropicalis</i>                 | western clawed frog         | 12199             |
| <i>X. laevis</i>                     | African clawed frog         | 8604              |
| <i>L. chalumnae</i>                  | coelacanth                  | 7941              |
| <i>C. picta</i>                      | western painted turtle      | 7631              |
| <i>P. sinensis</i>                   | Chinese soft-shelled turtle | 5200              |
| <i>C. mydas</i>                      | green sea turtle            | 4229              |
| <i>Nanorana parkeri</i>              | Nanorana parkeri            | 3347              |
| <i>Larimichthys crocea</i>           | large yellow croaker        | 2827              |
| N/A                                  | N/A                         | 2732              |
| <i>Shewanella frigidimarina</i>      | Shewanella frigidimarina    | 1960              |
| <i>A. carolinensis</i>               | green anole                 | 1937              |
| <i>Alligator mississippiensis</i>    | American alligator          | 1632              |
| <i>Cyprinus carpio</i>               | common carp                 | 1584              |
| <i>Oncorhynchus mykiss</i>           | rainbow trout               | 1443              |
| <i>Cordyceps militaris</i>           | Cordyceps militaris CM01    | 1395              |
| <i>Gekko japonicus</i>               | Gekko japonicus             | 1360              |
| <i>Plasmodium malariae</i>           | Plasmodium malariae         | 1350              |
| <i>Stylophora pistillata</i>         | Stylophora pistillata       | 1323              |
| <i>Crassostrea virginica</i>         | eastern oyster              | 1286              |
| <i>Strongylocentrotus purpuratus</i> | purple sea urchin           | 1013              |
| <i>Austrofundulus limnaeus</i>       | Austrofundulus limnaeus     | 978               |
| <i>Oreochromis niloticus</i>         | Nile tilapia                | 923               |
| <i>Pogona vitticeps</i>              | central bearded dragon      | 857               |
| <i>Daphnia magna</i>                 | Daphnia magna               | 850               |
| <i>H. sapiens</i>                    | human                       | 791               |
| <i>Arabidopsis thaliana</i>          | thale cress                 | 735               |
| <i>M. musculus</i>                   | house mouse                 | 722               |
| <i>Acropora digitifera</i>           | Acropora digitifera         | 710               |
| <i>Trichuris suis</i>                | pig whipworm                | 679               |
| <i>Crassostrea gigas</i>             | Pacific oyster              | 668               |

**Table 4.** Orthogroup overlaps.

|                 | <i>H. sap</i> | <i>M. mus</i> | <i>G. gal</i> | <i>P. sin</i> | <i>A. car</i> | <i>P. waltl</i> | <i>X. lae</i> | <i>X. tro</i> | <i>L. cha</i> | <i>D. rer</i> |
|-----------------|---------------|---------------|---------------|---------------|---------------|-----------------|---------------|---------------|---------------|---------------|
| <i>H. sap</i>   | 14745         | 14479         | 11648         | 12095         | 12313         | 13283           | 12903         | 11904         | 12320         | 12250         |
| <i>M. mus</i>   |               | 14656         | 11603         | 12049         | 12259         | 13203           | 12839         | 11858         | 12263         | 12199         |
| <i>G. gal</i>   |               |               | 12162         | 11240         | 11129         | 11748           | 11536         | 10787         | 11054         | 11010         |
| <i>P. sin</i>   |               |               |               | 12936         | 11664         | 12372           | 11977         | 11149         | 11569         | 11370         |
| <i>A. car</i>   |               |               |               |               | 13218         | 12685           | 12237         | 11387         | 11775         | 11570         |
| <i>P. waltl</i> |               |               |               |               |               | 15923           | 14183         | 12499         | 13091         | 12844         |
| <i>X. lae</i>   |               |               |               |               |               |                 | 15185         | 13043         | 12606         | 12556         |
| <i>X. tro</i>   |               |               |               |               |               |                 |               | 13255         | 11686         | 11583         |
| <i>L. cha</i>   |               |               |               |               |               |                 |               |               | 13664         | 12078         |
| <i>D. rer</i>   |               |               |               |               |               |                 |               |               |               | 13340         |

*H. sap*: *H. sapiens*, *M. mus*: *M. musculus*, *G. gal*: *G. gallus*, *P. sin*: *P. sinensis*, *A. car*: *A. carolinensis*,  
*X. lae*: *X. leavis*, *X. tro*: *X. tropicalis*, *L. cha*: *L. chalumnae*, *D. rer*: *D. rerio*

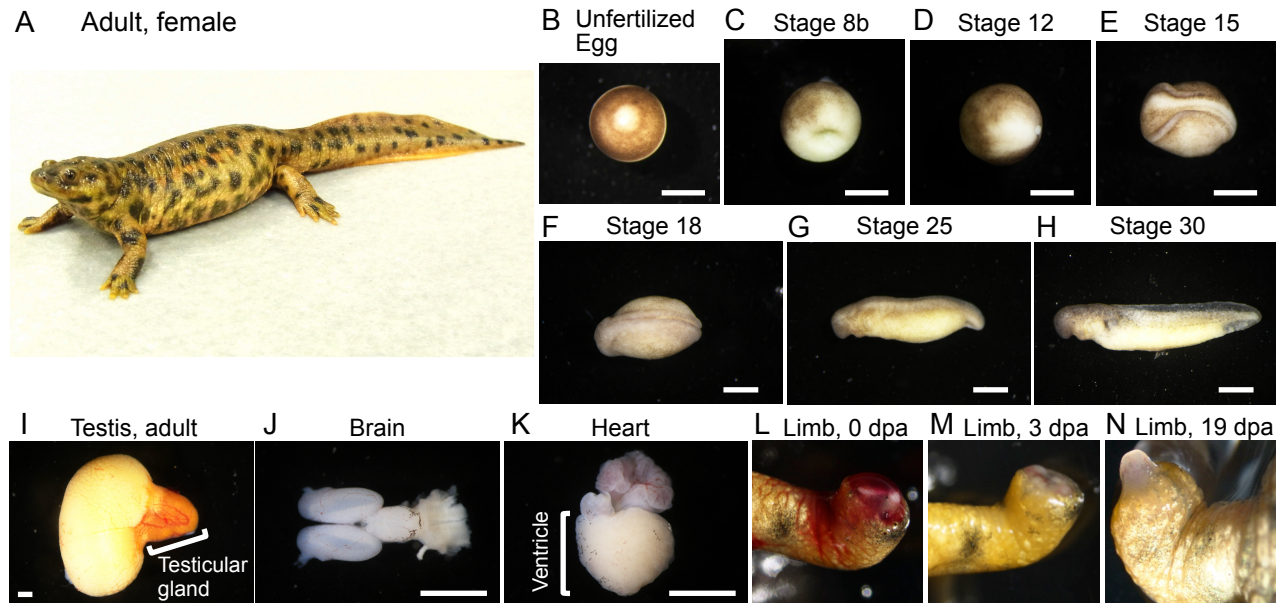

**Figure 1. Organs and embryos used for RNA preparation.**

Panel (A) provides a picture of a whole adult female. (B-N) Examples of tissues and organs used for preparation of RNA. dpa: days post amputation. Scale bars: 1 mm.

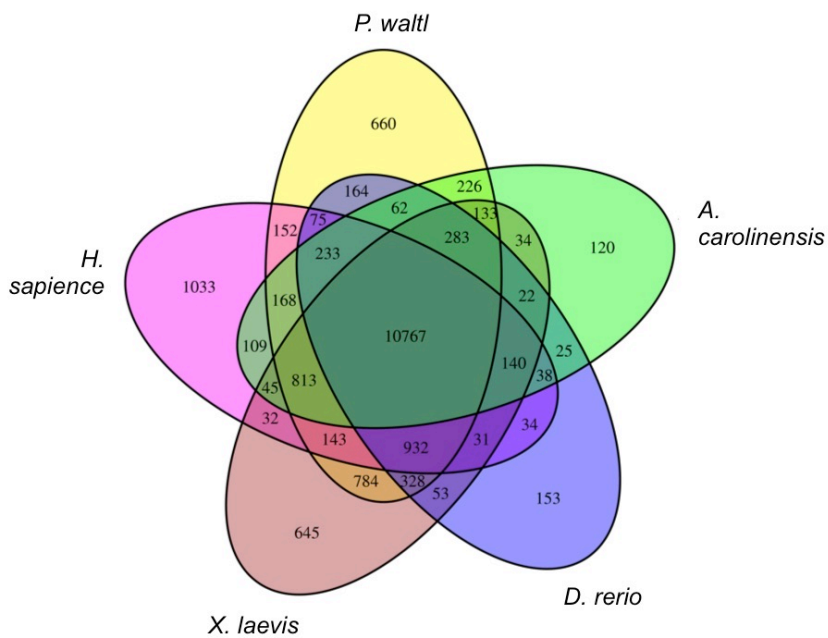

**Figure 2. Venn diagram of shared and unique orthogroups in five vertebrates.** Orthogroups were identified by clustering of orthologous groups using OrthoFinder.

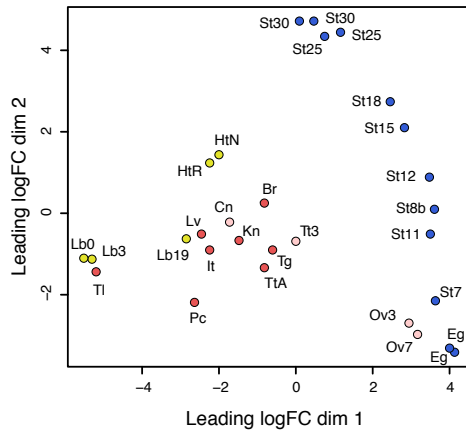

**Figure 3. MDS plot for RNA-Seq gene expression of *P. waltil* tissues, organs, and embryogenesis samples.** Multi-dimensional scaling (MDS) plot showing relatedness between transcript expression profiles of organs, tissues, and embryos of *P. waltil* at different developmental stages. Red dots represent the expression profiles of adult tissues/organs and pink dots represent those of juveniles (3 or 7 months). The labels indicate the tissues and sources as follows, Br: brain (adult), Cn: connective tissue (3 months), It: intestine (adult), Kn: kidney (adult), Lv: liver (adult), Ov3: ovary (3 months), Ov7: ovary (7 months), Pc: pancreas (adult), Tg: testicular gland (adult), TtA: testis (adult), and Tt3: testis (3 months). Blue dots represent the expression profiles during embryogenesis. The labels indicate the stages as follows, Eg: unfertilized egg, St7: stage 7 (late blastula), St8b: stage 8b (early gastrula), St11: stage 11 (middle gastrula), St12: stage 12 (late gastrula), St15: stage 15 (neural plate stage), St18: stage 18 (late neural fold stage), St25: stage 25 (tail-bud stage), and St30: stage 30 (gill protrusion stage). Yellow dots represent the expression profiles in the regeneration process after amputation, where the labels Lb0, Lb3, and Lb19 indicate limb or limb blastema expression profiles at 0, 3, and 19 dpa (respectively); HtR and HtN indicate expression profiles of the hearts regenerating after amputation and in unamputated controls (respectively).

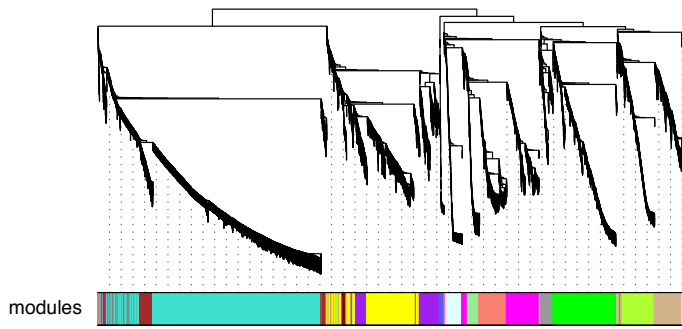

**Figure 4. Gene co-expression analysis of *P. waltl* transcriptome.** Hierarchical cluster tree of the *P. waltl* genes showing co-expression modules identified using WGCNA. Modules correspond to branches and are labelled by colors as indicated by the color band underneath the tree.

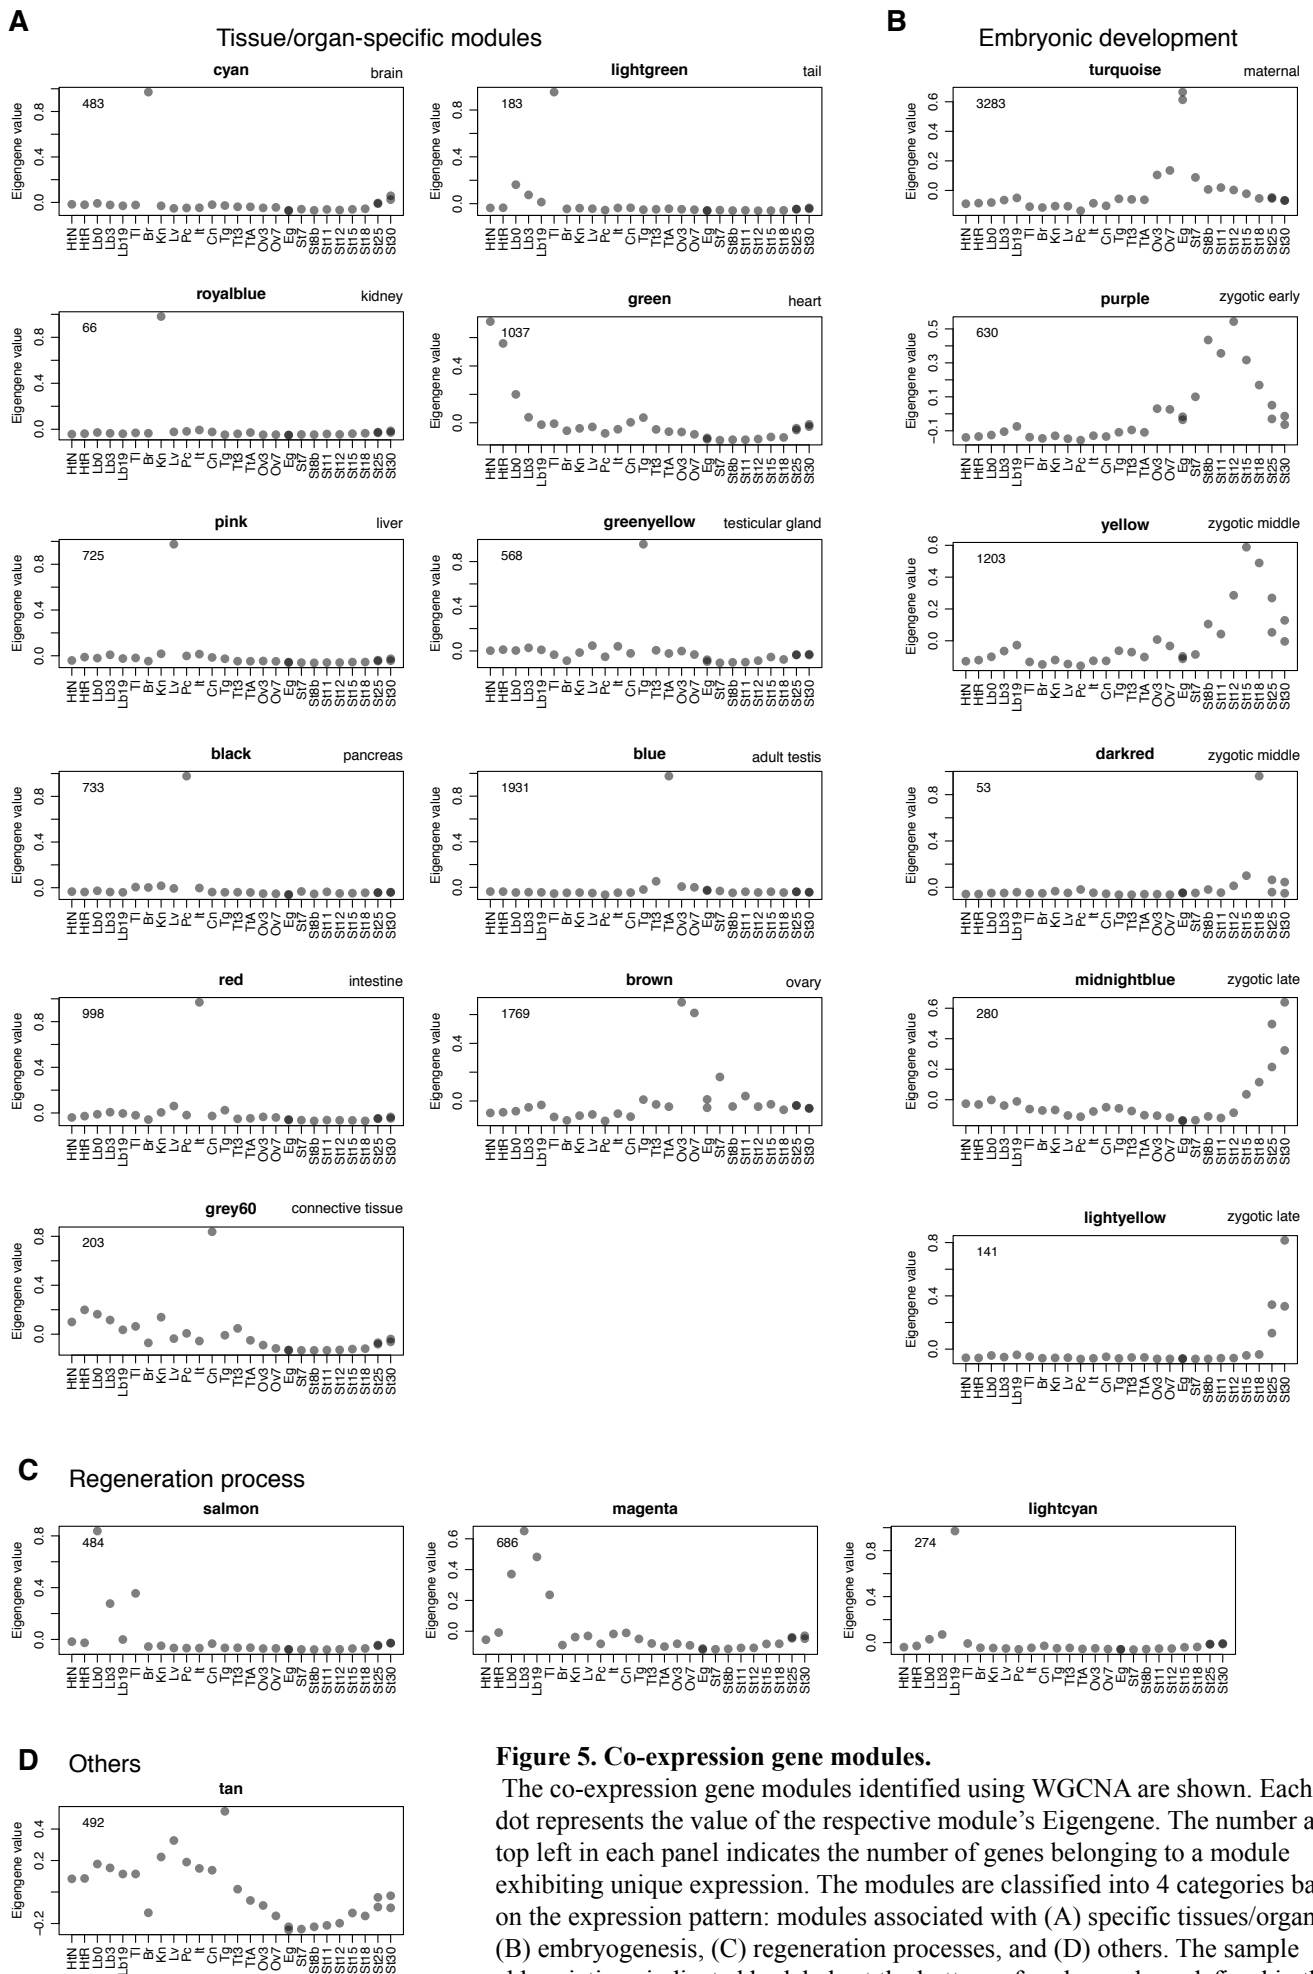

**Figure 5. Co-expression gene modules.**

The co-expression gene modules identified using WGCNA are shown. Each grey dot represents the value of the respective module's Eigengene. The number at the top left in each panel indicates the number of genes belonging to a module exhibiting unique expression. The modules are classified into 4 categories based on the expression pattern: modules associated with (A) specific tissues/organs, (B) embryogenesis, (C) regeneration processes, and (D) others. The sample abbreviations indicated by labels at the bottom of each panel are defined in the Figure 3 legend.

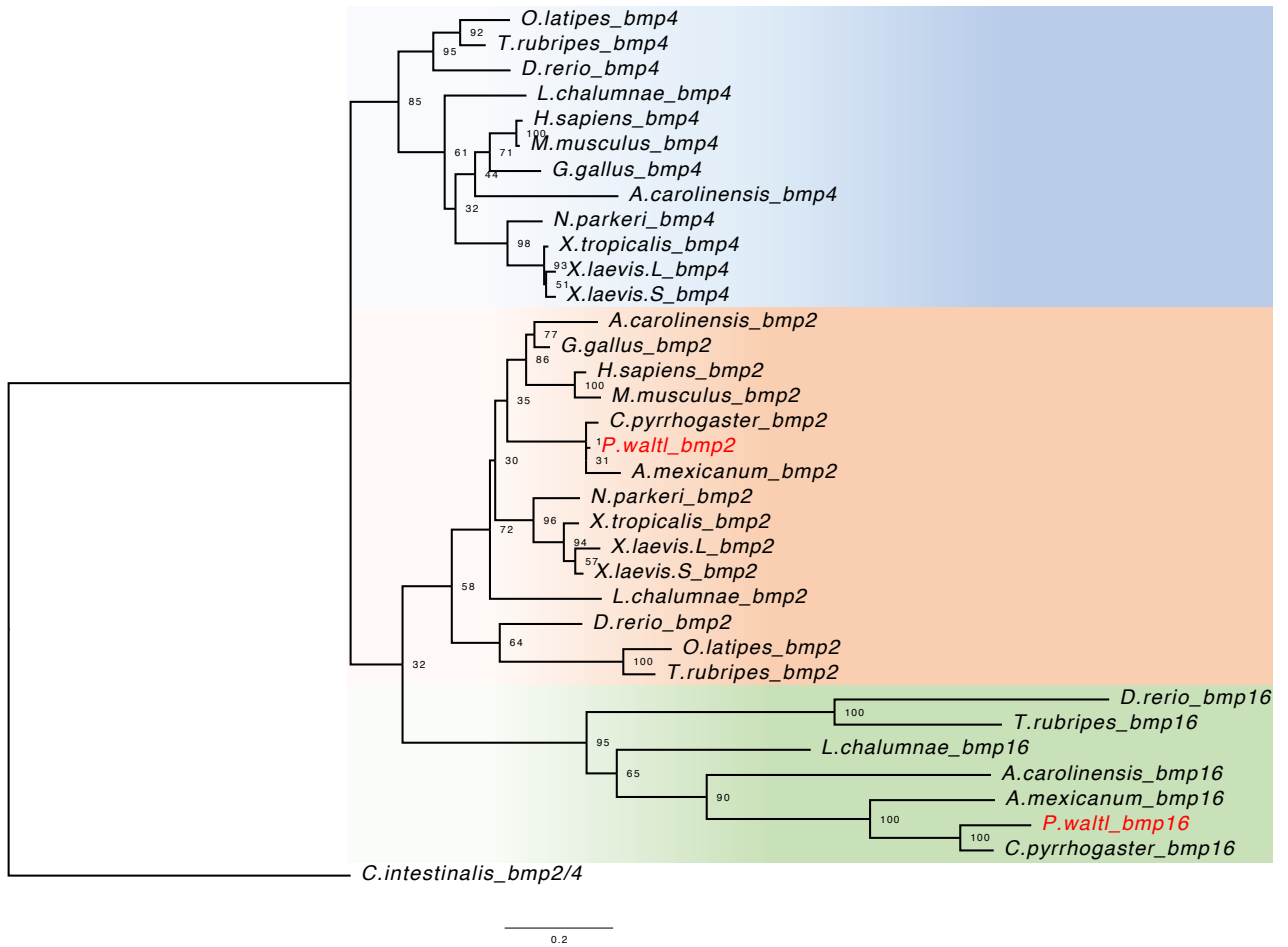

**Figure 6. Phylogenetic tree of *bmp2/4/16* genes among vertebrates.**

The phylogenetic tree was reconstructed using 34 vertebrate orthologs, including 12 *bmp4*, 15 *bmp2*, and 7 *bmp16* genes; an ascidian *bmp2/4* was used as the outgroup. The number at each node represents the bootstrap probability.



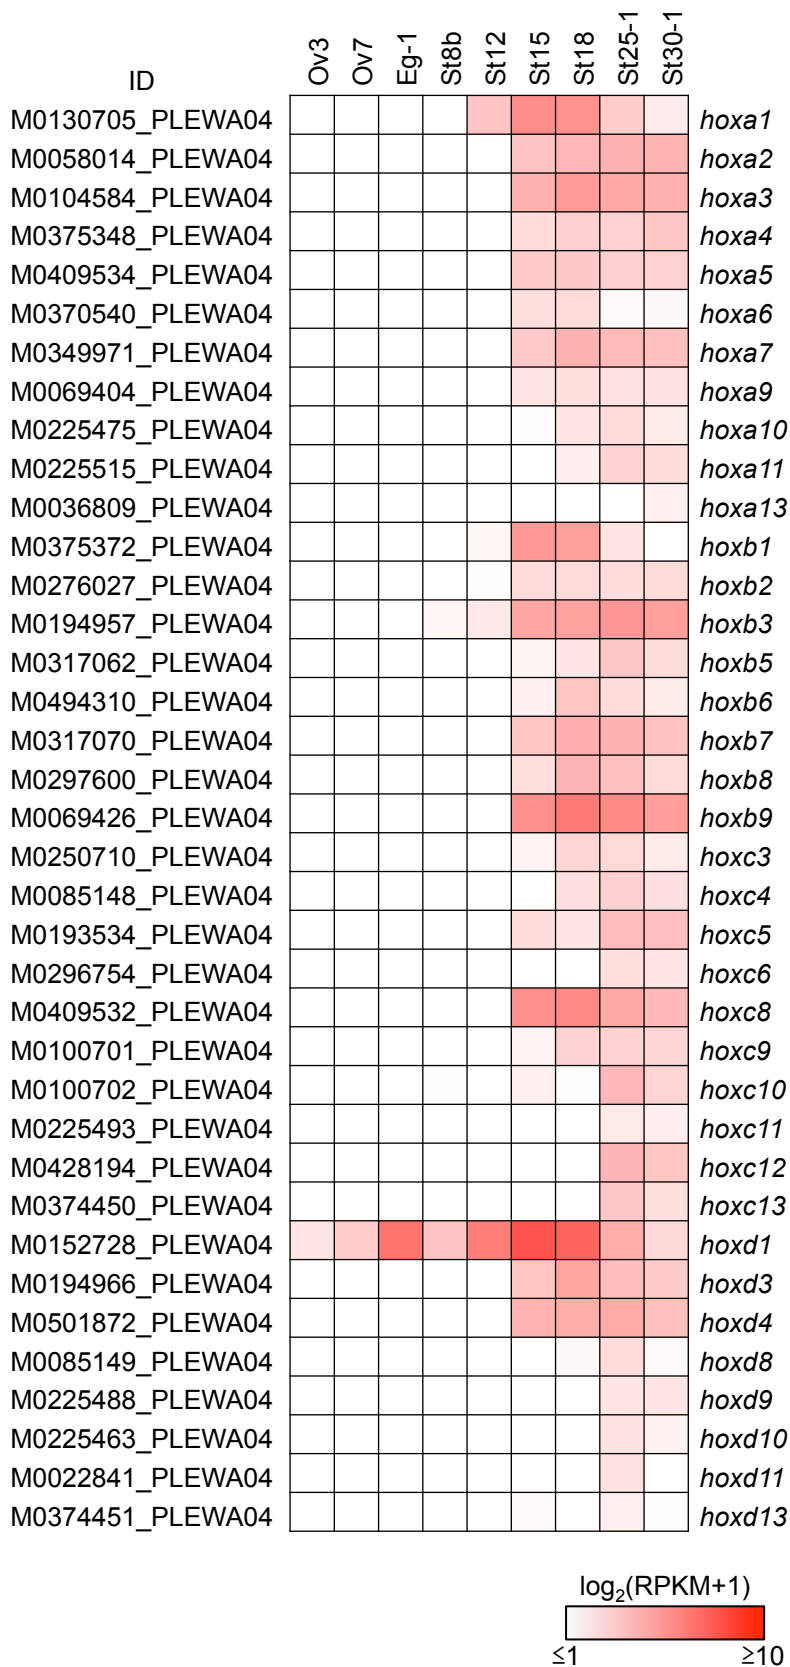

**Figure 7. Expression profile of *hox* genes during oogenesis and embryogenesis.**

A total of 37 *hox* genes are listed from the assembly data of PLEWA04. The sample abbreviations indicated by labels at the bottom of each panel are in the Figure 3 legend. Ovaries were sampled at three and six months after metamorphosis (Ov3 and Ov6, respectively). Note that *P. waltl* *hoxb13*, *hoxc1*, and *hoxd12* orthologs were not identified from our transcriptome data. Most of the *hox* genes were zygotically activated; only the *hoxd1* mRNA was synthesized through oogenesis and stored at the one-cell stage. RPKM values of each gene are indicated as a color gradient on a  $\log_{10}$  scale, ranging from red (maximum) to white (minimum).

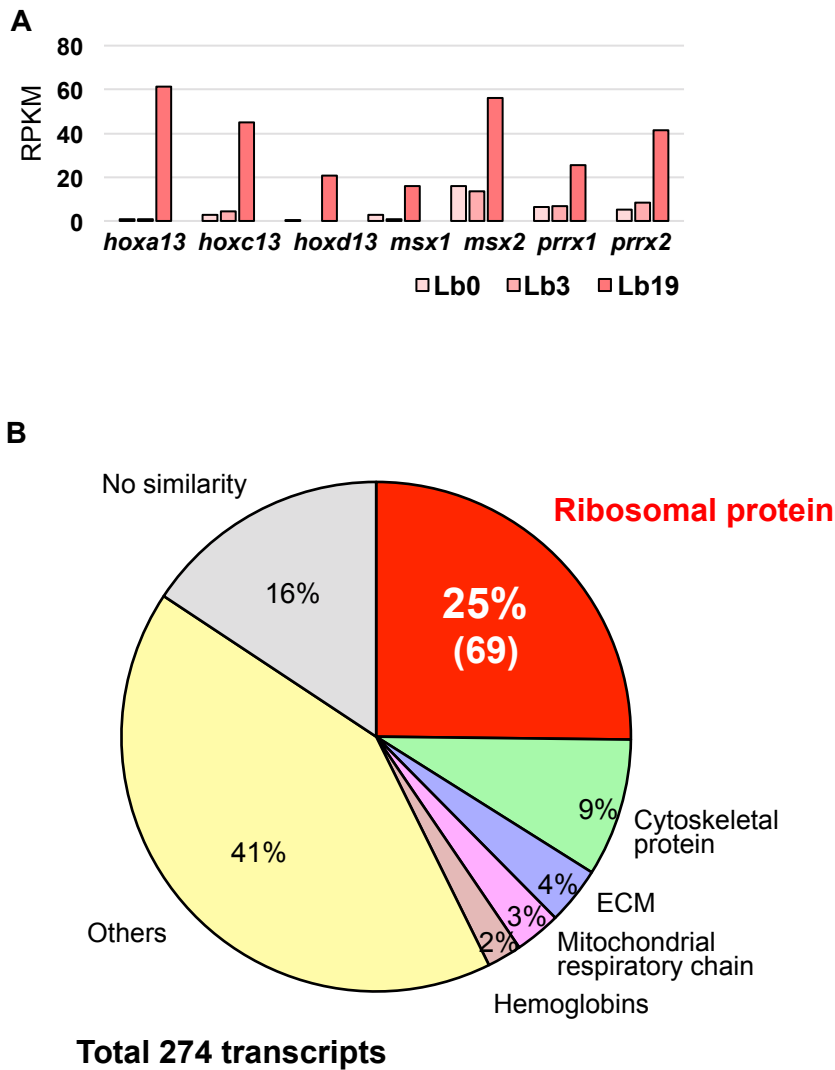

**Figure 8. Expression profile of regenerating limb-enriched genes.**

(a) Expression of transcription factor-encoding genes involved in limb development during regeneration. The *hox13*, *msx1* and *2*, *prrx1* and *2*, *tbx5*, and *hand2* genes were significantly up-regulated in the forelimb at 19 dpa. RPKM values of each gene were determined from the assembly data of PLEWA04. (b) Details of co-expressed genes in regenerating limb at 19 dpa. A total of 274 genes in this WGCNA module (indicated by light cyan symbols in Fig. 5) were identified. Notably, genes encoding proteins of the large and small ribosomal subunits accounted for 25% (69 out of 274) of the genes in this module.
